# Supplementary material for: Effect of Transcutaneous Vagus Nerve Stimulation in Erosive Hand Osteoarthritis: Results from a Pilot Trial
Source: MDPI journal article supplement (doi:10.3390/jcm11041087), 2022-02-18
Supplement: s1 [file s1]

**Supplementary Table S1: Exclusion criteria**

|                    |                                                                                                                                                                                                                                                                                                                                                                                                                                                                                                                                                                                                                                                                                                                                                                                                                                                                                                                                                                                                                                                                                                                                                                                                                                                                                                                                                                                                                                                                                                                                                                                                                                                                                                                                                                                                                                                                                                                                                                                                                                                                                                                                                                                                                  |
|--------------------|------------------------------------------------------------------------------------------------------------------------------------------------------------------------------------------------------------------------------------------------------------------------------------------------------------------------------------------------------------------------------------------------------------------------------------------------------------------------------------------------------------------------------------------------------------------------------------------------------------------------------------------------------------------------------------------------------------------------------------------------------------------------------------------------------------------------------------------------------------------------------------------------------------------------------------------------------------------------------------------------------------------------------------------------------------------------------------------------------------------------------------------------------------------------------------------------------------------------------------------------------------------------------------------------------------------------------------------------------------------------------------------------------------------------------------------------------------------------------------------------------------------------------------------------------------------------------------------------------------------------------------------------------------------------------------------------------------------------------------------------------------------------------------------------------------------------------------------------------------------------------------------------------------------------------------------------------------------------------------------------------------------------------------------------------------------------------------------------------------------------------------------------------------------------------------------------------------------|
| Exclusion criteria | <ul style="list-style-type: none"><li>• Isolated thumb osteoarthritis</li><li>• HOA secondary to other known causes (e.g., gout, reactive arthritis, RA, psoriatic arthritis, spondyloarthropathies, septic arthritis)</li><li>• Skin psoriasis</li><li>• Current skin disease of the left ear interfering with the application of the auricular electrode for stimulation (eczema, urticarial lesion, skin infection, external otitis, etc.)</li><li>• Auditory canal not adapted to the application of the ear electrode</li><li>• Known history of cardiac rhythm disturbances, atrioventricular block &gt; 1st degree, conduction disturbances</li><li>• Symptomatic orthostatic hypotension or history of recurrent vagal syncope</li><li>• History of vagotomy</li><li>• Documented sleep apnea</li><li>• Existence of a painful syndrome of the upper limbs, which would interfere with assessment of HOA symptoms.</li><li>• Fibromyalgia</li><li>• Use of other medical devices electrically active (pacemaker, TENS for chronic pain)</li><li>• Use of oral, intramuscular or intra-articular or intravenous corticosteroids, immunosuppressants (methotrexate, sulfasalazine, leflunomide, biological disease-modifying antirheumatic drugs), of hyaluronic acid infiltration in the finger joints in the previous 3 months</li><li>• Any new OA treatment of the hand within the previous month, including physiotherapy and a new digital orthosis.</li><li>• Hand surgery planned during the study.</li><li>• Use of any investigational (unapproved) medication within 3 months prior to the screening.</li><li>• Serious and uncontrolled concomitant disease, including cardiovascular, nervous system, pulmonary, renal, hepatic, endocrine, gastrointestinal or epileptic disease, which, in the opinion of the investigator, would make the study unfeasible.</li><li>• Pregnant or breastfeeding woman</li><li>• Patient under legal protection (guardianship or curatorship) and patient deprived of liberty</li><li>• Participation in other research intervention or in the exclusion period following a previous research if applicable</li><li>• Patient without social care</li></ul> |
|--------------------|------------------------------------------------------------------------------------------------------------------------------------------------------------------------------------------------------------------------------------------------------------------------------------------------------------------------------------------------------------------------------------------------------------------------------------------------------------------------------------------------------------------------------------------------------------------------------------------------------------------------------------------------------------------------------------------------------------------------------------------------------------------------------------------------------------------------------------------------------------------------------------------------------------------------------------------------------------------------------------------------------------------------------------------------------------------------------------------------------------------------------------------------------------------------------------------------------------------------------------------------------------------------------------------------------------------------------------------------------------------------------------------------------------------------------------------------------------------------------------------------------------------------------------------------------------------------------------------------------------------------------------------------------------------------------------------------------------------------------------------------------------------------------------------------------------------------------------------------------------------------------------------------------------------------------------------------------------------------------------------------------------------------------------------------------------------------------------------------------------------------------------------------------------------------------------------------------------------|

|  |                                                                                 |
|--|---------------------------------------------------------------------------------|
|  | <ul style="list-style-type: none"> <li>• Taking NSAIDs &lt; 48 hours</li> </ul> |
|--|---------------------------------------------------------------------------------|

**Supplementary Table S2: Reported adverse events of 4 weeks of the tVNS in EHOA patients.**

| <b>Patient number</b> | <b>Adverse event</b>                               | <b>Related to device (Yes/No/uncertain)</b> | <b>Severity</b> | <b>Recovery at 4 weeks</b> |
|-----------------------|----------------------------------------------------|---------------------------------------------|-----------------|----------------------------|
| <b>2</b>              | Bilateral conjunctivitis                           | No                                          | Minor           | Yes                        |
| <b>6</b>              | Local tingling                                     | Yes                                         | Minor           | Yes                        |
| <b>6</b>              | Hand pain when trying to replace the earpiece      | Yes                                         | Mild            | Yes                        |
| <b>6</b>              | Post-stimulation fatigue                           | Yes                                         | Mild            | Yes                        |
| <b>7</b>              | Local tingling                                     | Yes                                         | Minor           | Yes                        |
| <b>7</b>              | Insomnia                                           | Uncertain                                   | Mild            | No                         |
| <b>8</b>              | Local tingling                                     | Yes                                         | Minor           | Yes                        |
| <b>8</b>              | Auricular device desadaptation of the cymba concha |                                             | Minor           | No                         |
| <b>12</b>             | Local auricular pain                               | Yes                                         | Minor           | Yes                        |
| <b>13</b>             | Local auricular pain                               | Yes                                         | Minor           | No                         |
| <b>13</b>             | Scotoma right eye                                  | No                                          | Minor           | No                         |
| <b>15</b>             | Local auricular pain                               | Yes                                         | Minor           | No                         |
| <b>19</b>             | Floating body left eye                             | No                                          | Minor           | Yes                        |
